# Supplementary material
Source: PubMed Central journal article supplement (PMC4746087)

Supplemental Figure for:  
High Proliferation Predicts Pathological Complete Response to Neoadjuvant Chemotherapy in Early Breast Cancer  
Emilio Alba Conejo et al.

**Figure S1.** Distribution of staining for Ki67 in 10-expression levels. Histograms show the proportion of Ki67 staining in selected intervals every 10 units.

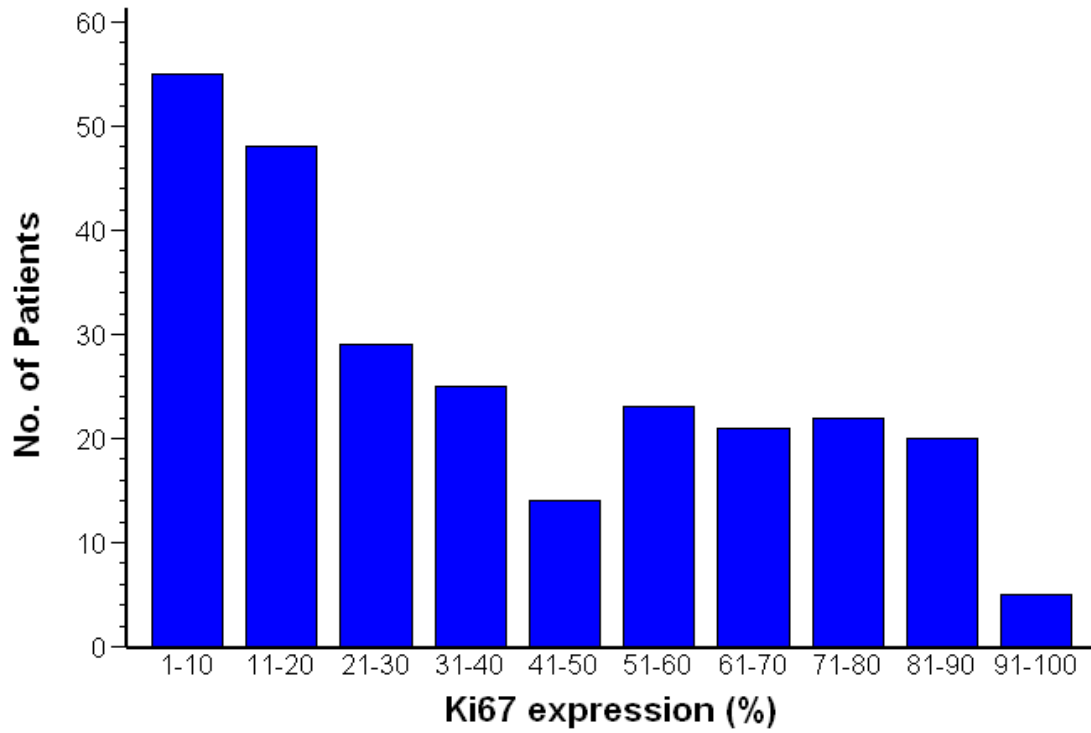

Supplement: supp_the2015-0312_Supplemental_Figure.pdf [file supp_the2015-0312_Supplemental_Figure.pdf]
