# Supplementary material
Source: PubMed Central journal article supplement (PMC4746087)
Supplement: supp_the2015-0312_Supplemental_Tables.pdf [file supp_the2015-0312_Supplemental_Tables.pdf]

Supplemental Tables for:  
High Proliferation Predicts Pathological Complete Response to Neoadjuvant Chemotherapy in Early Breast Cancer  
Emilio Alba Conejo et al.

**Table S1.** Univariate analysis for factors associated to pCR in breast and axilla. The table summarizes the individual association of different variables with the pCR by logistic regression univariate analysis. a) Significant p-values and 95%CI are indicated in bold. b) Reference value; c) TNM staging to define breast cancer by The American Joint Committee on Cancer (AJCC). CI, Confidence interval, EC-D, epirubicin plus cyclophosphamide followed by docetaxel; ER, estrogen receptors; EC-DCb, EC-D plus carboplatin; EC-DL, EC-D plus lapatinib; EC-DH, EC-D plus trastuzumab; GAT, gemcitabine, adriamycin, and paclitaxel; MDH, Myocet™, docetaxel, and trastuzumab; OR, Odds ratio; PR, progesterone receptors.

|                                     | <i>P-value</i> <sup>a</sup> | OR (95%CI)                    |
|-------------------------------------|-----------------------------|-------------------------------|
| <b>Treatment</b>                    | <b>0.0023</b>               |                               |
| EC-D <sup>b</sup>                   |                             |                               |
| EC-DCb                              | 0.1765                      | 2.593 (1.077 – 6.239)         |
| EC-DL                               | 0.5829                      | 2.037 (0.812 – 5.111)         |
| EC-DH                               | 0.0008                      | 4.750 (1.999 – 11.285)        |
| GAT                                 | 0.0159                      | 0.484 (0.128 – 1.823)         |
| MDH                                 | 0.6906                      | 1.957 (0.739 – 5.181)         |
| <b>Age</b>                          | 0.4166                      | 1.010 (0.986 – 1.035)         |
| <b>Menopausal status</b>            | 0.2613                      | 1.372 (0.790 – 2.383)         |
| Posmenopausal (vs. Premenopausal )  |                             |                               |
| <b>Tumor size (continuous)</b>      | <b>0.0368</b>               | <b>0.870 (0.763 – 0.991)</b>  |
| <b>Tumor size</b> <sup>c</sup>      | 0.2982                      |                               |
| T1 <sup>b</sup>                     |                             |                               |
| T2                                  | 0.8374                      | 0.581 (0.222 – 1.520)         |
| T3                                  | 0.1603                      | 0.368 (0.125 – 1.084)         |
| T4                                  | 0.5764                      | 0.441 (0.116 – 1.684)         |
| <b>Nodal status</b> <sup>a</sup>    | 0.4085                      |                               |
| N0 <sup>b</sup>                     |                             |                               |
| N1                                  | 0.3215                      | 1.499 (0.824 – 2.724)         |
| N2                                  | 0.9433                      | 1.182 (0.419 – 3.337)         |
| <b>Histologic grade</b>             | <b>0.0185</b>               |                               |
| G1 <sup>b</sup>                     |                             |                               |
| G2                                  | 0.7312                      | 2.368 (0.507 – 11.066)        |
| G3,                                 | 0.0056                      | 5.467 (1.217 – 24.563)        |
| GX                                  | 0.3753                      | 3.636 (0.689 – 19.194)        |
| <b>ER negative (vs. positive)</b>   | <b>&lt;0.0001</b>           | <b>4.883 (2.604 – 9.157)</b>  |
| <b>PR negative (vs. positive)</b>   | <b>&lt;0.0001</b>           | <b>5.218 (2.582 – 10.547)</b> |
| <b>HER2 positive (vs. negative)</b> | <b>0.0041</b>               | <b>2.267 (1.296 – 3.968)</b>  |

|                                   | <i>P-value</i> <sup>a</sup> | OR (95%CI)                   |
|-----------------------------------|-----------------------------|------------------------------|
| <b>Subtypes (ER/HER2 status)</b>  | <b>0.0002</b>               |                              |
| ER+ HER2+ <sup>b</sup>            |                             |                              |
| ER+ HER2-                         | <b>0.0004</b>               | <b>0.046 (0.006 – 0.361)</b> |
| ER- HER2+                         | <b>&lt;0.0001</b>           | <b>3.013 (1.354 – 6.702)</b> |
| ER- HER2-                         | <b>0.0062</b>               | <b>1.687 (0.804 – 3.539)</b> |
| <b>Ki67 expression</b>            | <b>&lt;0.0001</b>           | <b>1.022 (1.011 – 1.032)</b> |
| <b>Ki67&gt;50% (vs. Ki67≤50%)</b> | <b>0.0005</b>               | <b>2.737 (1.554 – 4.823)</b> |

<sup>a</sup> p-values and 95%CI in bold are statistically significant.

<sup>b</sup> Reference value

<sup>c</sup> TNM staging to define breast cancer by The American Joint Committee on Cancer (AJCC).

CI, Confidence interval, EC-D, epirubicin plus cyclophosphamide followed by docetaxel; ER, estrogen receptors; EC-DCb, EC-D plus carboplatin; EC-DL, EC-D plus lapatinib; EC-DH, EC-D plus trastuzumab; GAT, gemcitabine, adriamycin, and paclitaxel; MDH, Myocet™, docetaxel, and trastuzumab; OR, Odds ratio; PR, progesterone receptors

**Table S2.** Multivariate analyses for factors associated to pCR in breast and axilla in the ER-HER2 and ER-HER2+ subpopulation. The table summarizes the logistic regression multivariate analyses in the ER-patient subgroup, those with the highest rates of pCR. pCR indicates pathologic complete response in breast and axilla. AUC indicates area under the curve.

|                                          | <b>OR</b> | <b>95% CI</b> | <b>P-value</b> |
|------------------------------------------|-----------|---------------|----------------|
| <b>Ki67&gt;50 (vs. Ki67≤50%)</b>         | 3.026     | 1.184 – 7.734 | 0.0208         |
| <b>HER2 positive (vs. HER2 negative)</b> | 3.390     | 1.317 – 8.726 | 0.0114         |

AUC=0.6178

**Table S3.** List of participating institutions in the GEICAM/2002-01, GEICAM/2003-03, GEICAM 2006-03 and GEICAM/2006-14.

Hospital Clínico Universitario de Valencia, Valencia, Spain  
Hospital Virgen de la Victoria, Málaga, Spain  
Hospital Miguel Servet, Zaragoza, Spain  
Complejo Hospitalario de Jaén, Jaén, Spain  
Hospital del Mar, Barcelona, Spain  
Complejo Hospitalario Universitario A Coruña, La Coruña, Spain  
Hospital Virgen de la Salud, Toledo, Spain  
Instituto Valenciano de Oncología, Valencia, Spain  
Hospital Reina Sofía, Córdoba, Spain  
Consorci Sanitari Parc Taulí, Sabadell, Spain  
Hospital Germans Trias i Pujol, Badalona, Spain  
Onkologikoa, San Sebastián, Spain  
Hospital Santa Creu i Sant Pau, Barcelona, Spain  
Althaia Xarxa Assistencial de Manresa, Manresa, Spain  
Consorci Sanitari de Terrassa, Terrassa, Spain  
Centro oncologico de Galicia, La Coruña, Spain  
Hospital Clinic i Provincial, Barcelona, Spain  
Hospital La Fe, Valencia, Spain  
Hospital Madrid Norte - Sanchinarro (CIOCC), Madrid, Spain  
Hospital de la Princesa, Madrid, Spain  
Hospital de Torrevieja, Torrevieja, Spain  
Hospital Mutua de Terrassa, Terrassa, Spain  
Hospital Infanta Cristina, Badajoz, Spain  
Institut Català d'Oncologia de Barcelona, Barcelona, Spain  
Hospital General de Granollers, Granollers, Spain  
Hospital Marqués de Valdecilla, Santander, Spain  
Hospital Universitario de Canarias, Santa Cruz de Tenerife, Spain  
Hospital Ramón y Cajal, Madrid, Spain  
Fundación Hospitalaria de Alcorcón, Alcorcón, Spain  
Hospital Puerta del Mar, Cádiz, Spain  
Complejo Hospitalario Xeral Calde, Lugo, Spain  
Hospital Lozano Blesa, Zaragoza, Spain  
Hospital Virgen de los Lirios, Alcoy, Spain  
Hospital General de Valencia, Valencia, Spain
